# Supplementary material
Source: PubMed Central journal article supplement (PMC5715590)

Anti-PLY

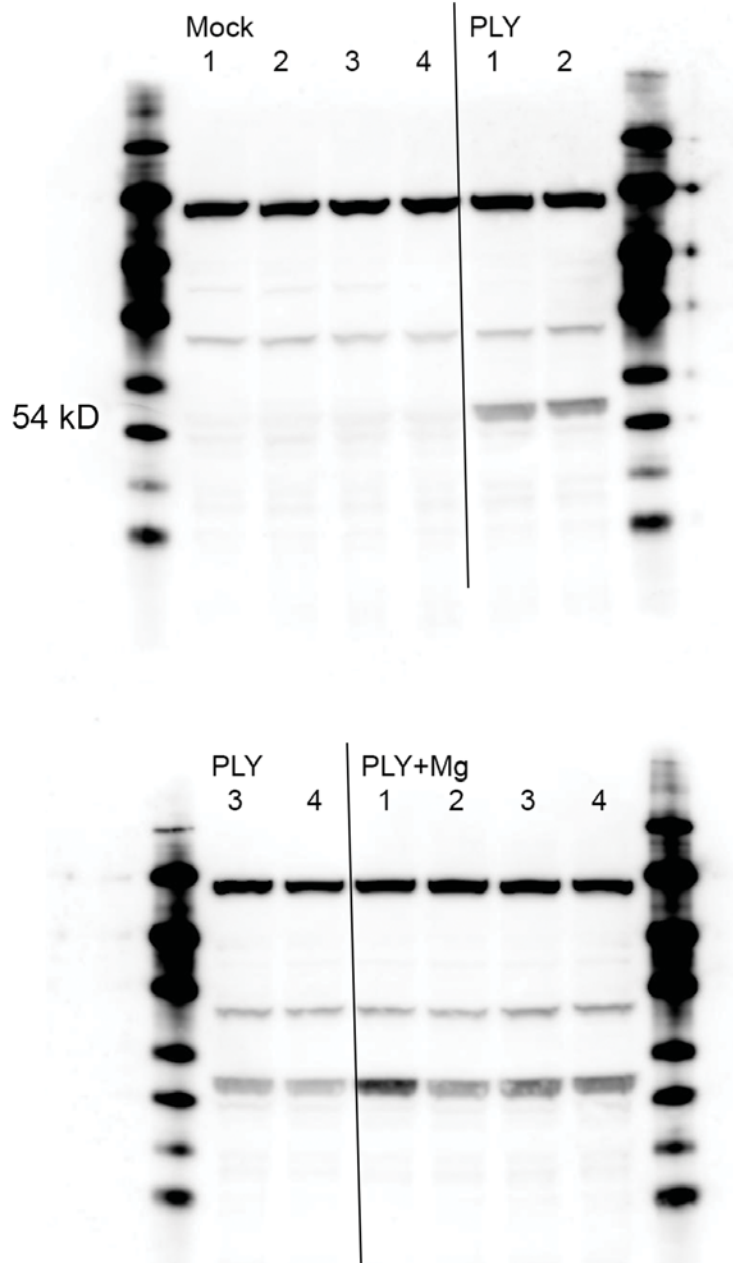

Anti-actin

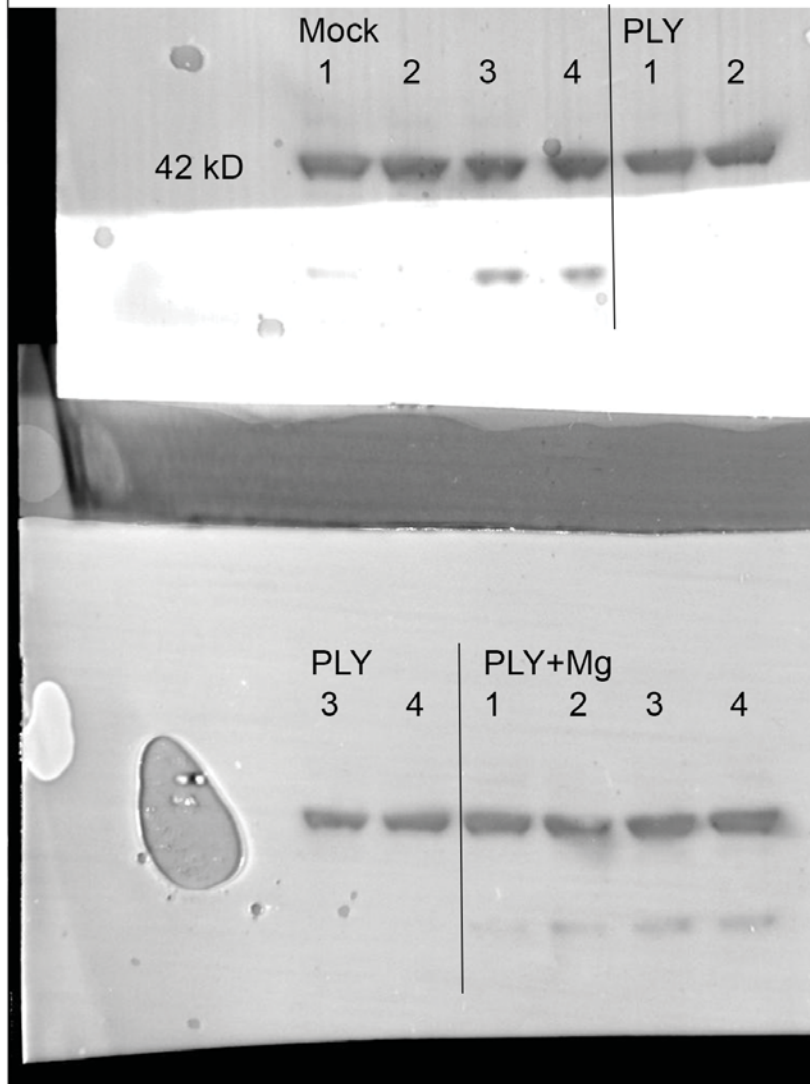

Supplement: BPH-174-4295-s002.pdf [file BPH-174-4295-s002.pdf]
